# Supplementary material for: SELINA: Single-cell Assignment using Multiple-Adversarial Domain Adaptation Network with Large-scale References
Source: bioRxiv or medRxiv preprint supplement (doi:10.1101/2022.01.14.476306), 2022-01-17

# Supplementary Figure 1

**a**

**Quality control**

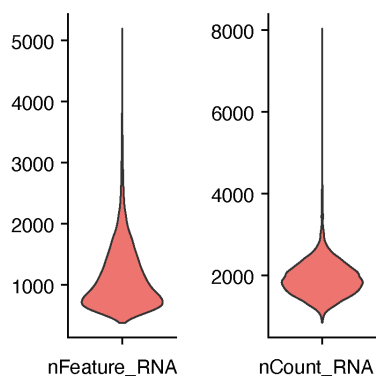

**PCA**

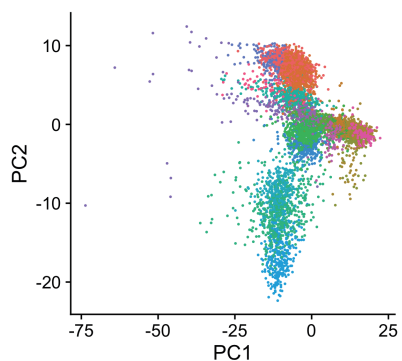

**Batch removal**  
Within dataset

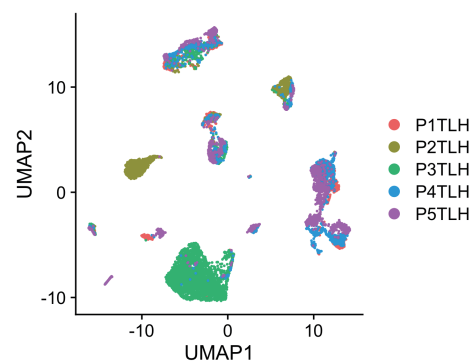

**Clustering**

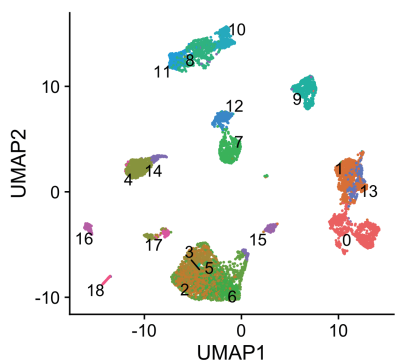

**Marker checking**

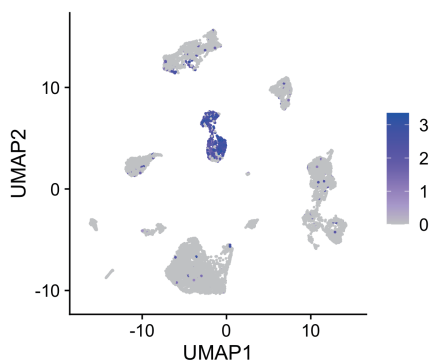

**Annotation**

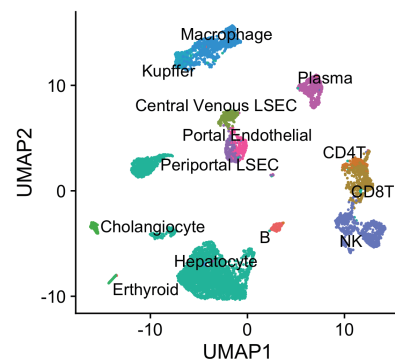

**b**

**Lineage extraction**

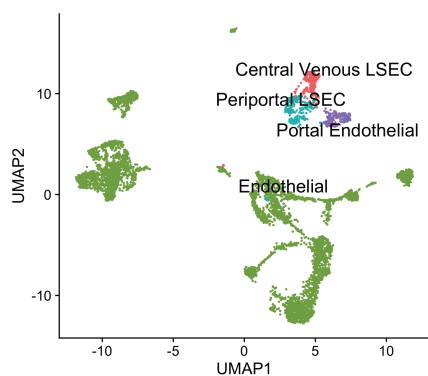

**PCA**

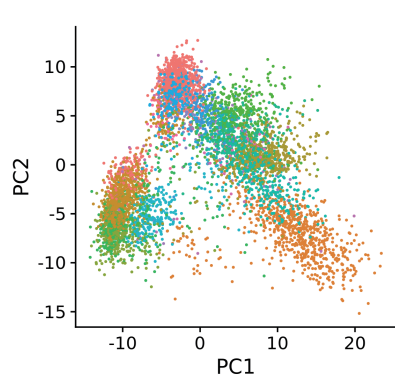

**Batch removal**  
Among datasets

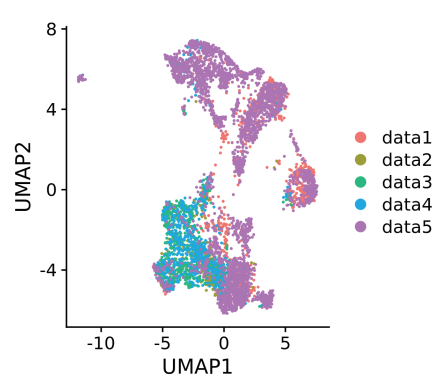

**Re-clustering**

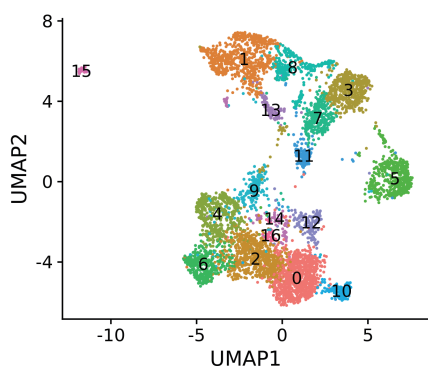

**Marker checking**

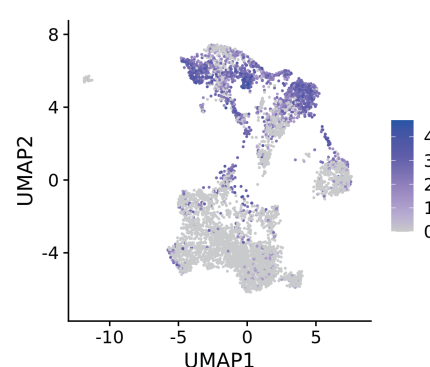

**Re-annotation**

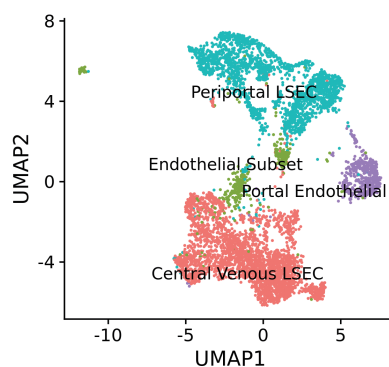

# Supplementary Figure 2

**a**

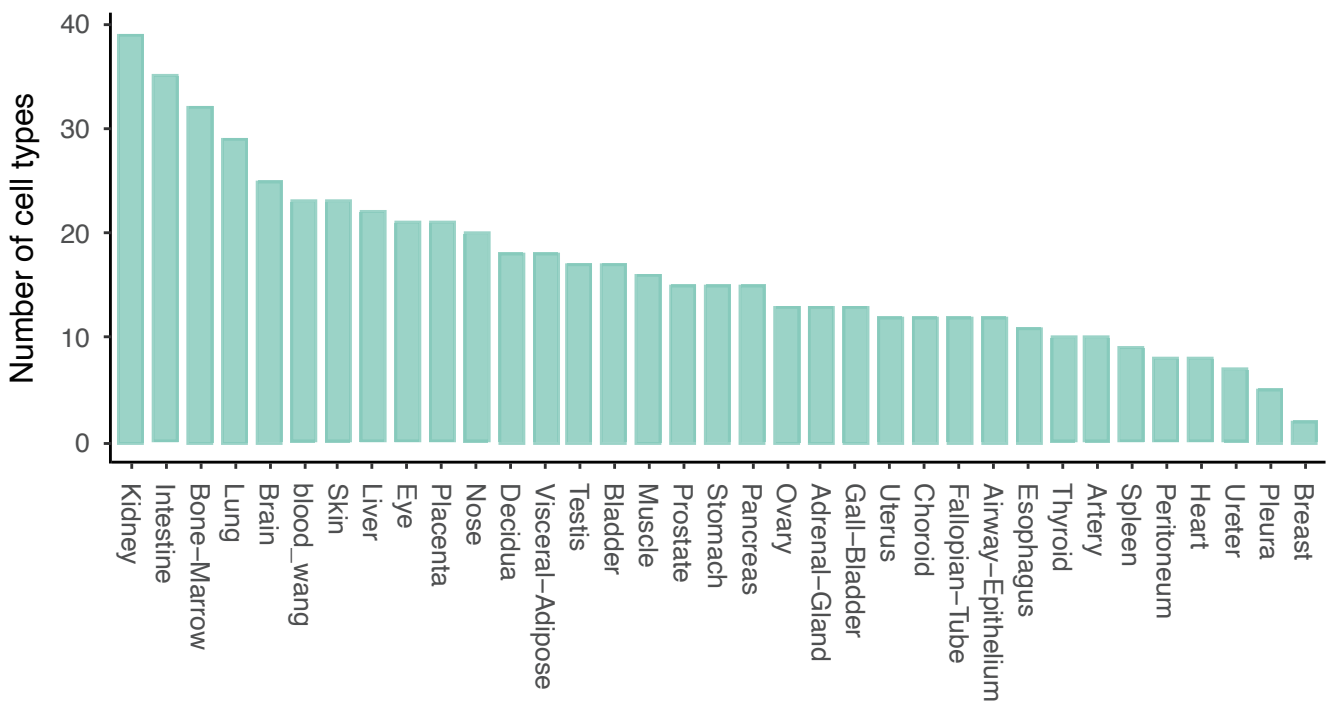

**b**

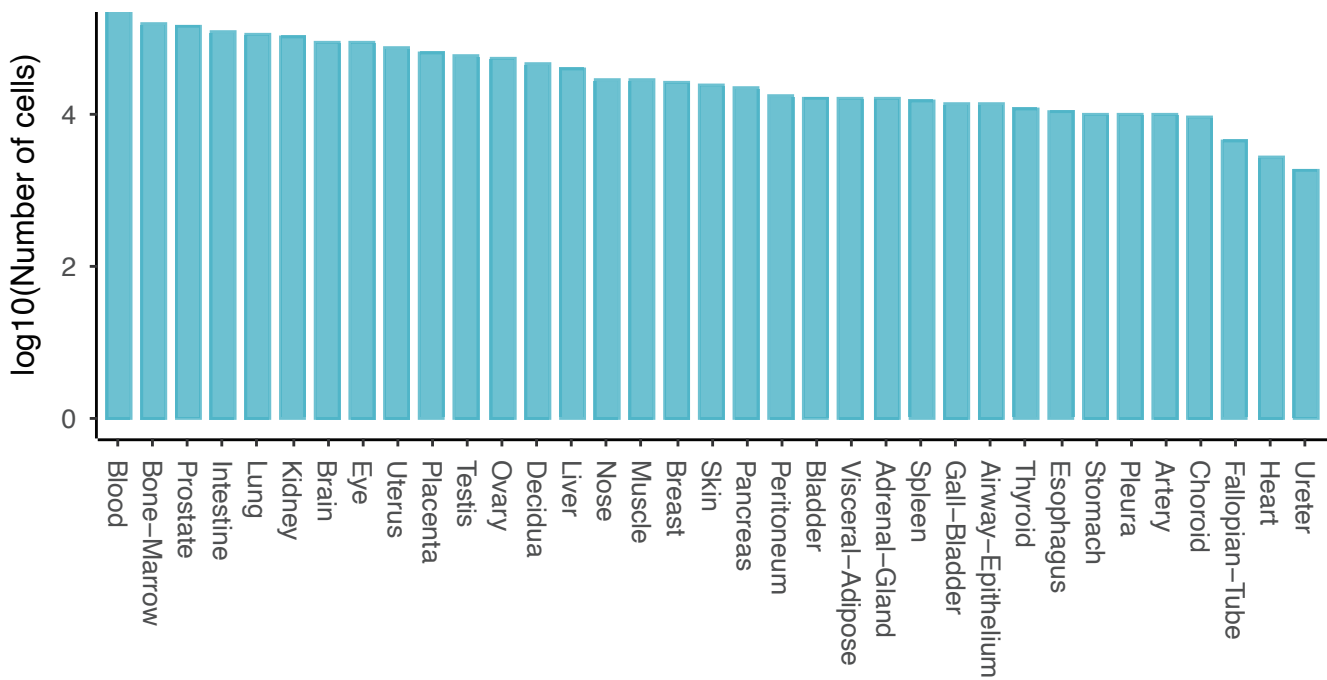

# Supplementary Figure 3

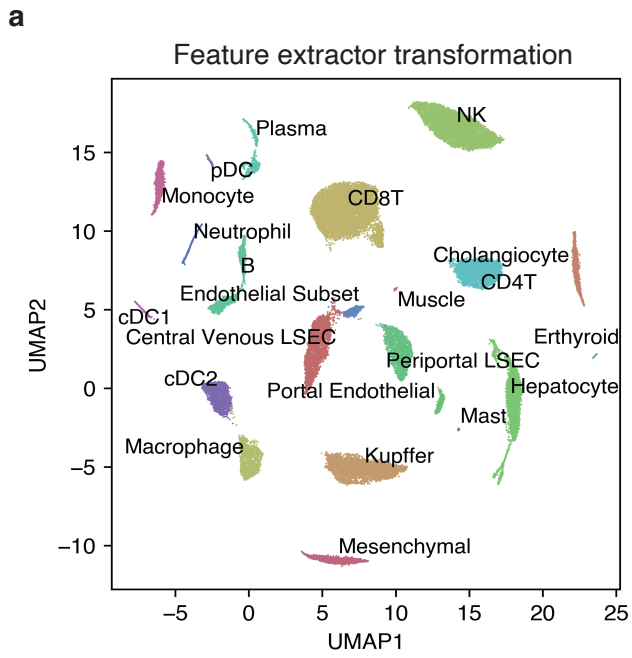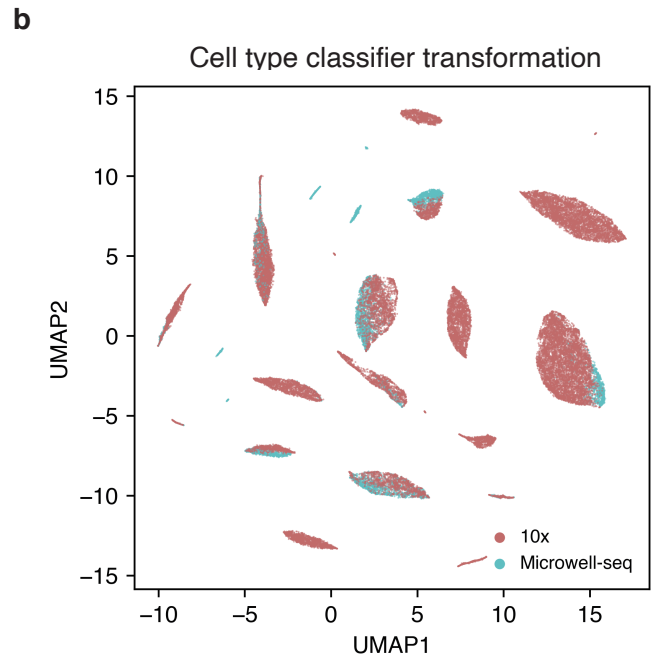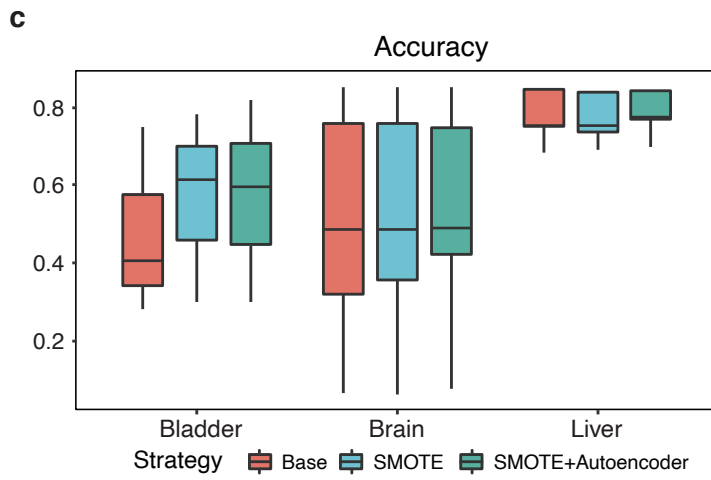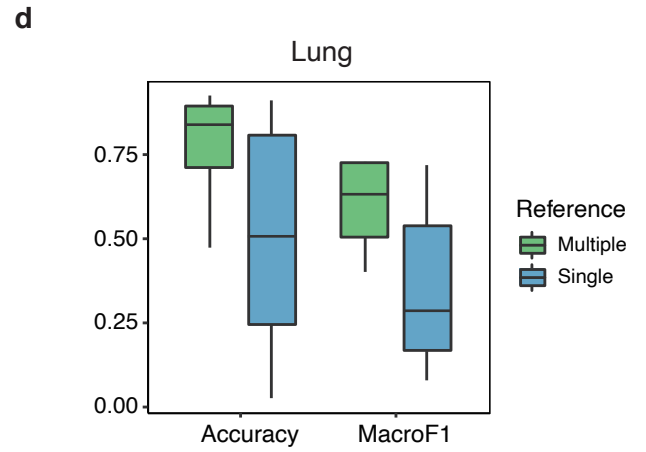

# Supplementary Figure 4

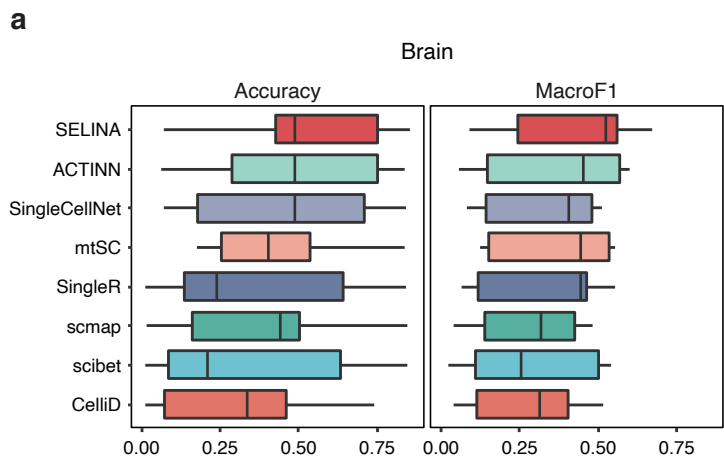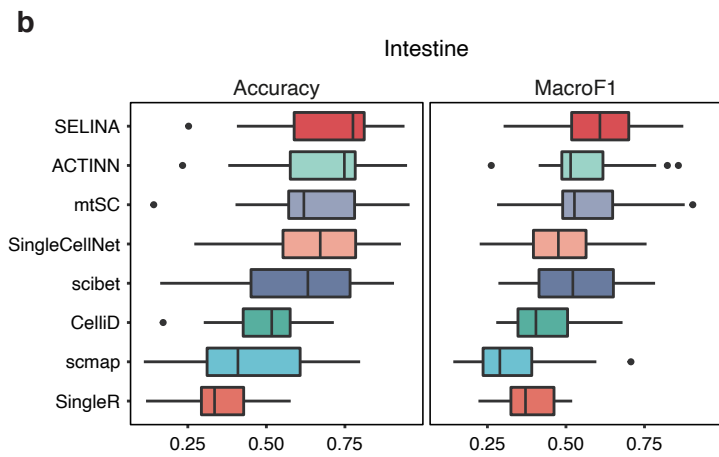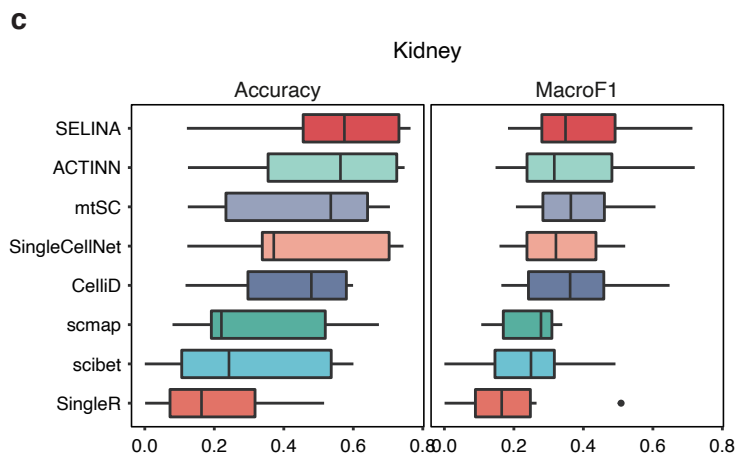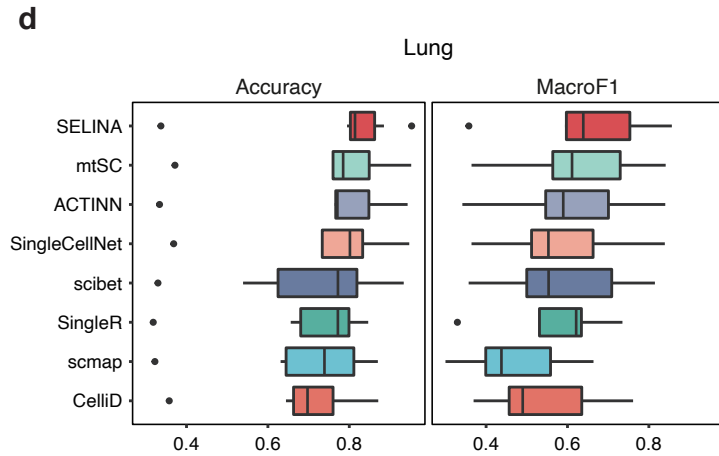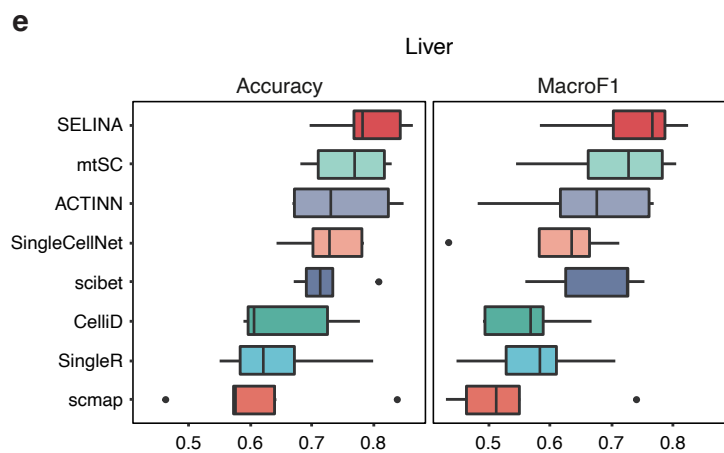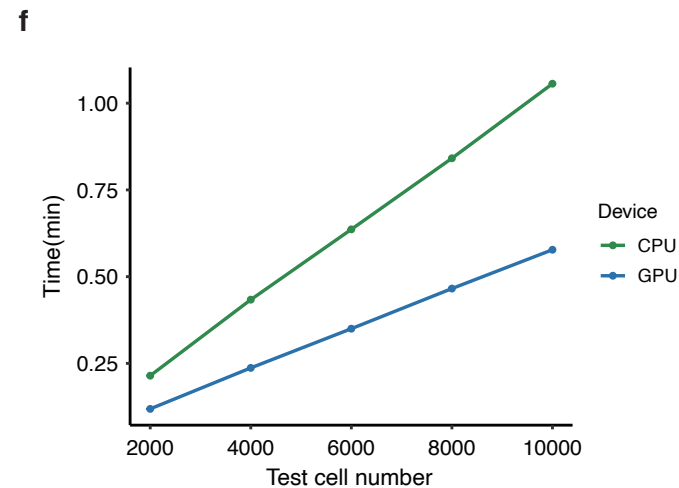

Supplement: Supplementary file [file media-1.pdf]
